# Supplementary figures and images for: o-HA Accelerates Skin Wound Healing in Mice by Enhancing Fibroblast Proliferation and Antioxidant Capacity
Source: Research Square preprint supplement (doi:10.21203/rs.3.rs-8762667/v1), 2026-02-11

**Supplementary data**


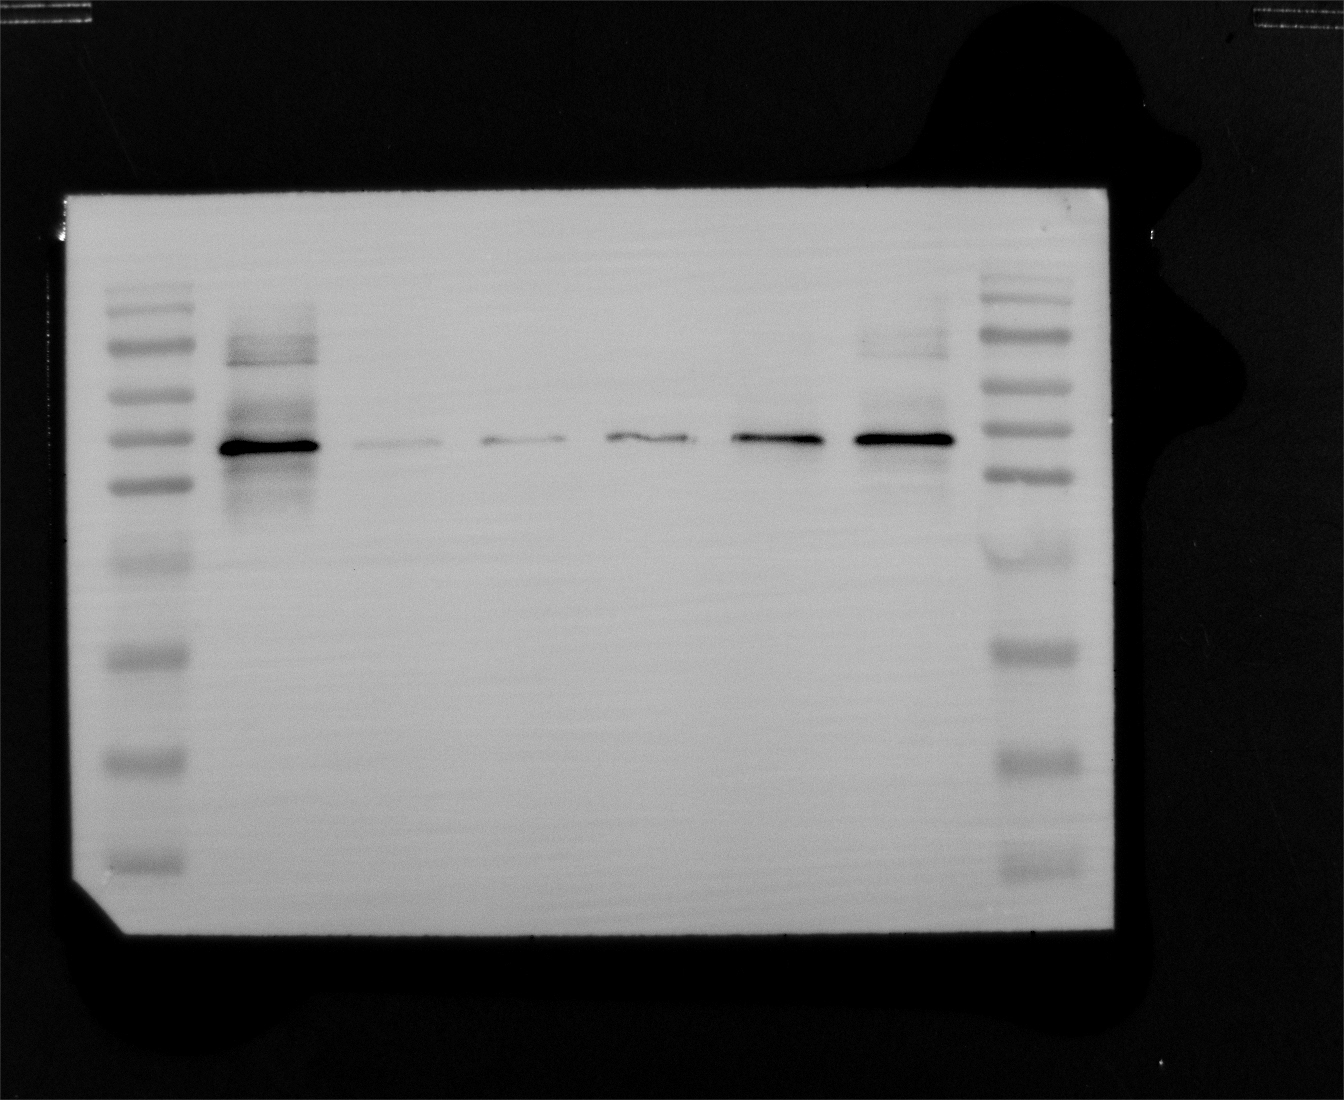

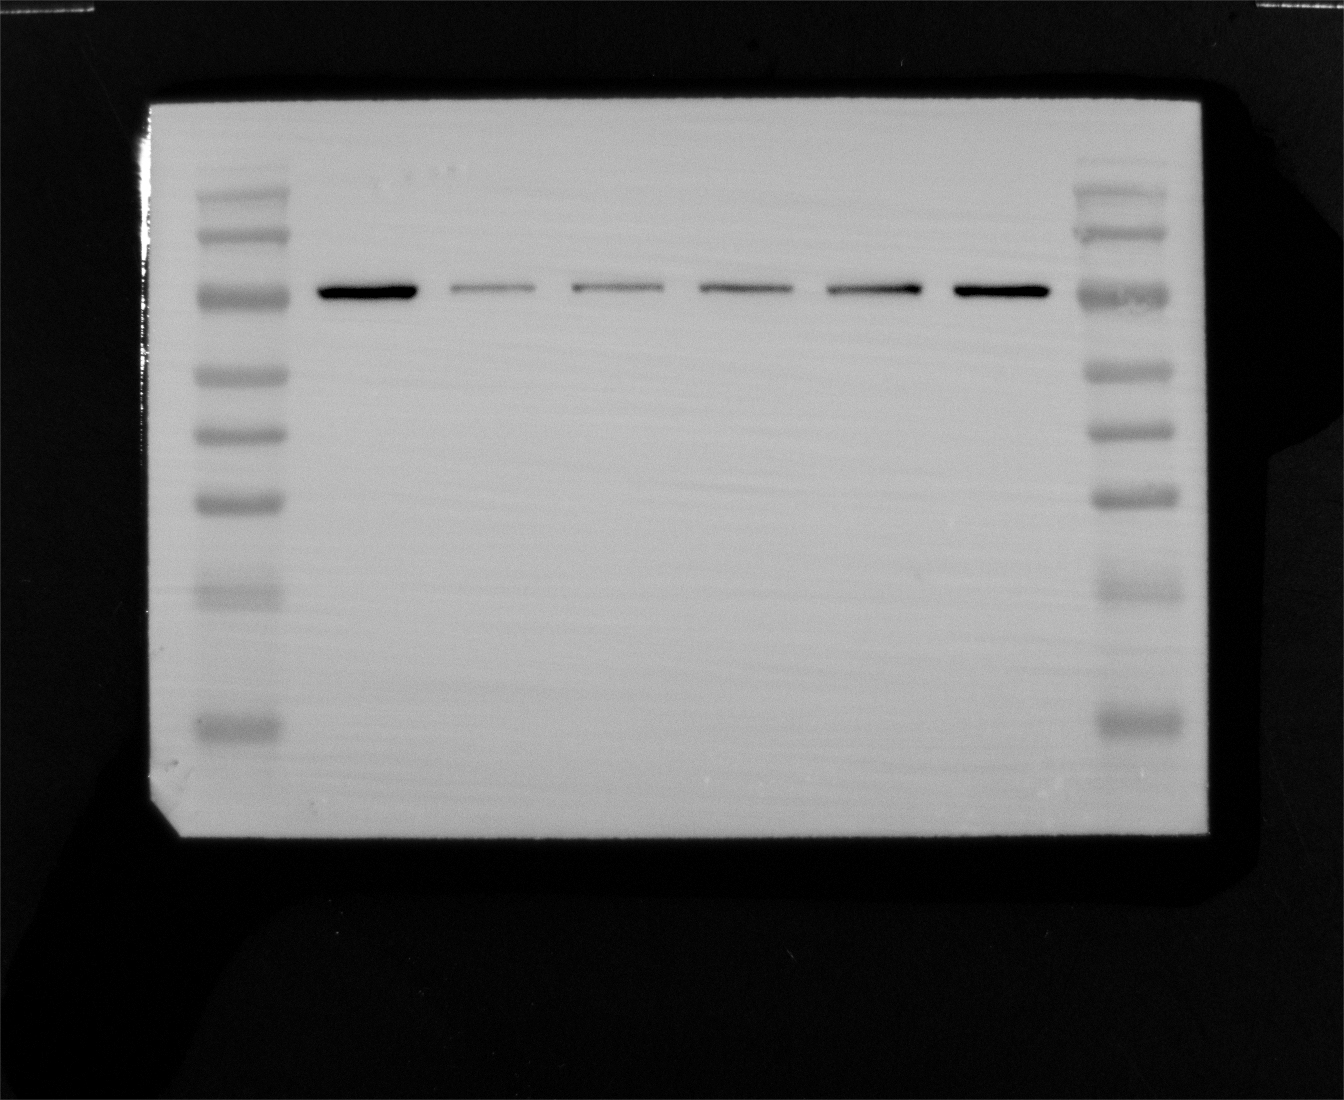

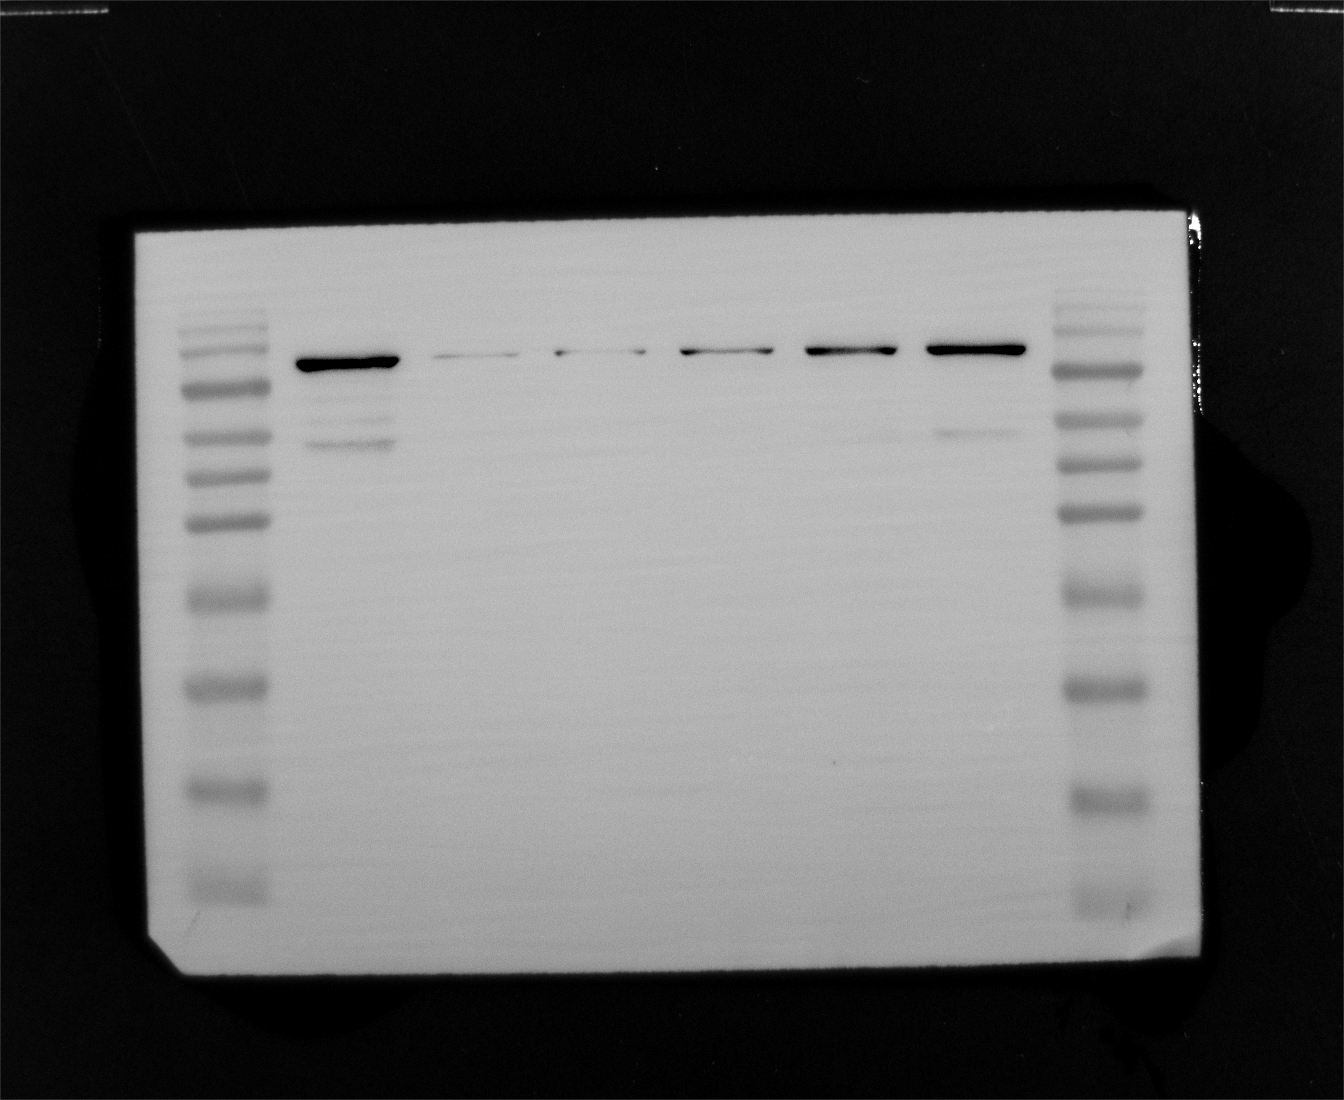

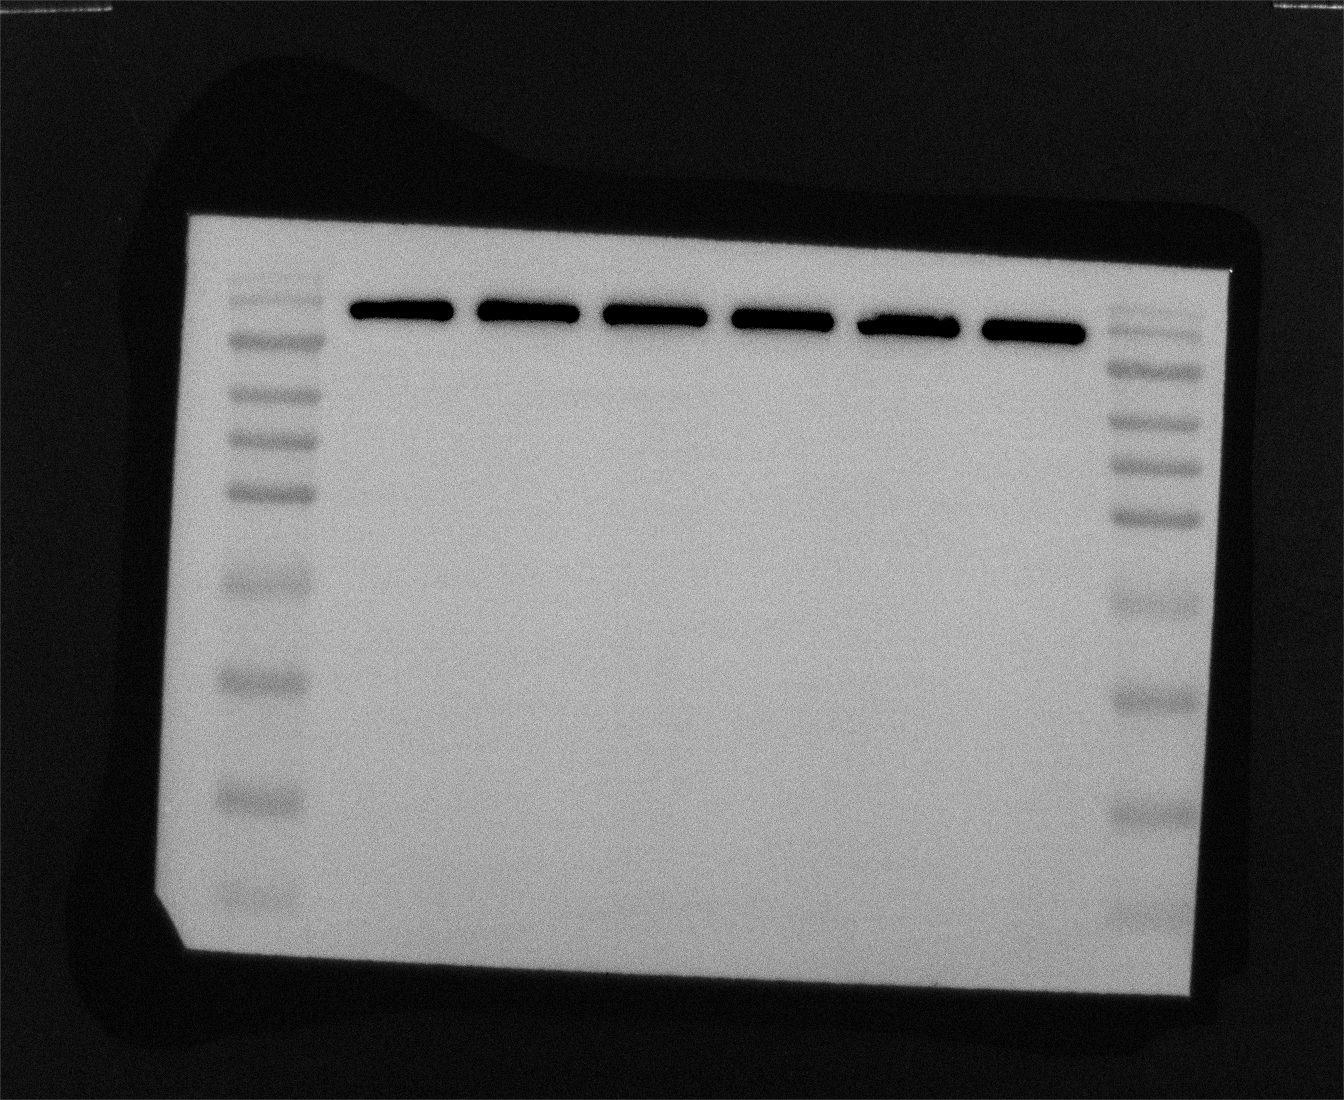

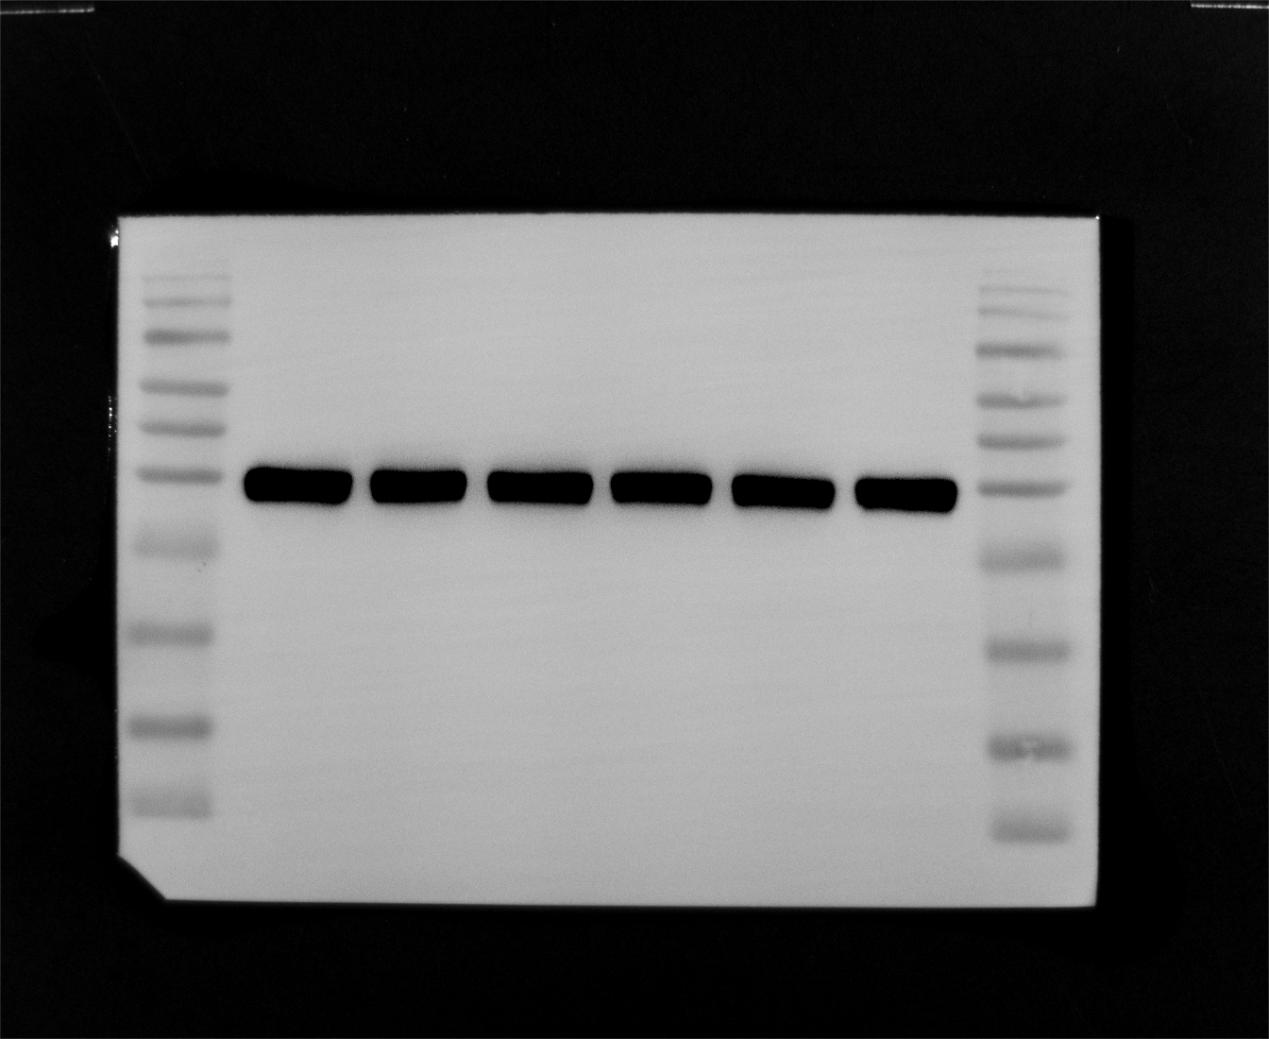

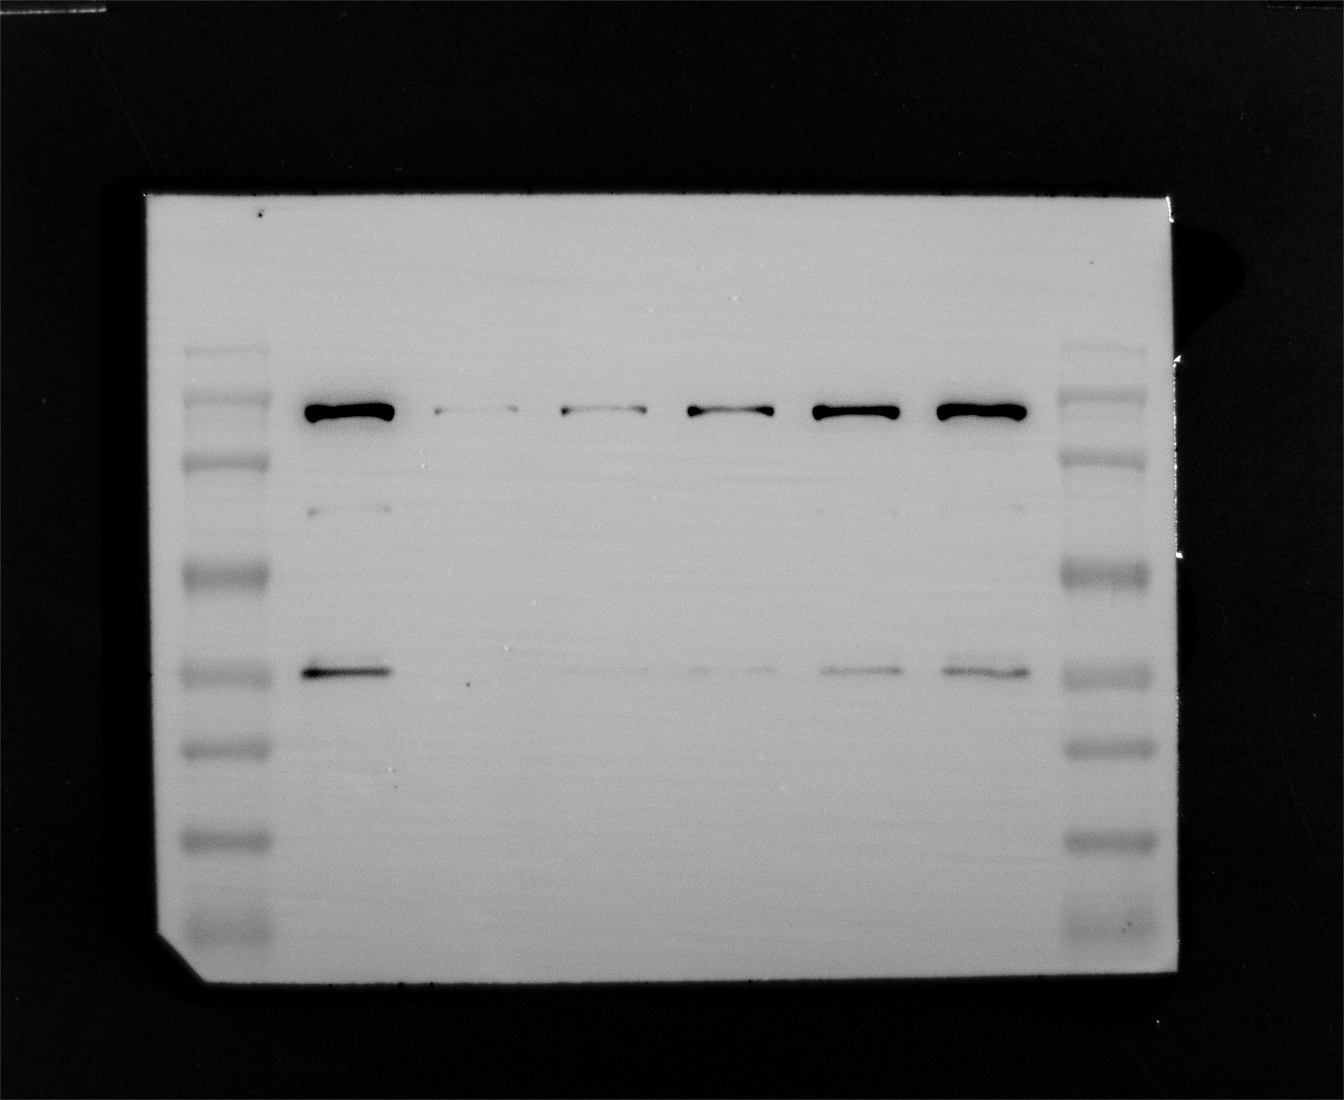

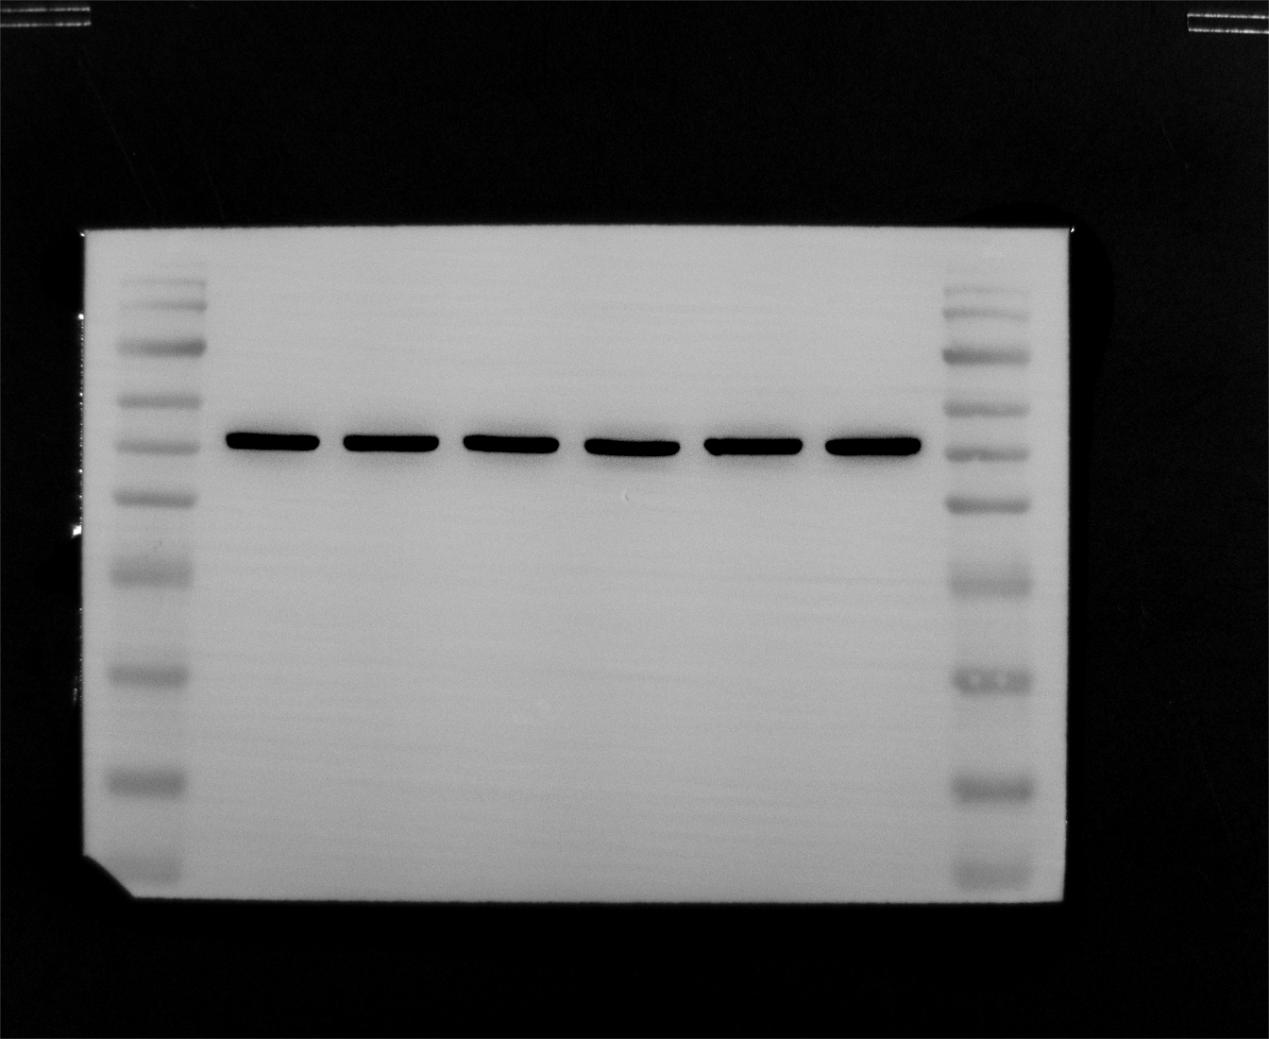


140 kDa

Collagen I

140

85 kDa

P-I3K

70 kDa

TGF-β1

36 kDa

GAPDH

PI3K

85 kDa

42 kDa

β-Actin

38 kDa

VEGFA

Supplement: Supplementary file 1 [file 255edc7ed75f3260510e934e.docx]
